# Supplementary material for: Upconversion luminescence in sub-10 nm β-NaGdF4:Yb3+,Er3+ nanoparticles: an improved synthesis in anhydrous ionic liquids
Source: Royal Society of Chemistry journal article supplement (doi:10.1039/c9ra05950d), 2019-01-01
Supplement: c9ra05950d1.pdf [file c9ra05950d1.pdf]

## SUPPORTING INFORMATION

### **Upconversion luminescence in sub-10 nm $\beta$ -NaGdF<sub>4</sub>: Yb<sup>3+</sup>, Er<sup>3+</sup> nanoparticles: An improved synthesis in anhydrous ionic liquids**

Gabriella Tessitore,<sup>a,b</sup> Anja-Verena Mudring,<sup>\*c</sup> and Karl W. Krämer<sup>\*a</sup>

<sup>a</sup> *University of Bern, Department of Chemistry and Biochemistry, Freiestrasse 3, 3012 Bern, Switzerland.*

<sup>b</sup> *Concordia University, Department of Chemistry and Biochemistry, 7141 Sherbrooke W., H4B1R6, Montreal, QC, Canada.*

<sup>c</sup> *Stockholm University, Department of Materials and Environmental Chemistry, Svante Arrhenius väg 16 C, 106 91 Stockholm, Sweden.*

\*E-mail address: [anja-verena.mudring@mmk.su.se](mailto:anja-verena.mudring@mmk.su.se); [karl.kraemer@dcb.unibe.ch](mailto:karl.kraemer@dcb.unibe.ch).

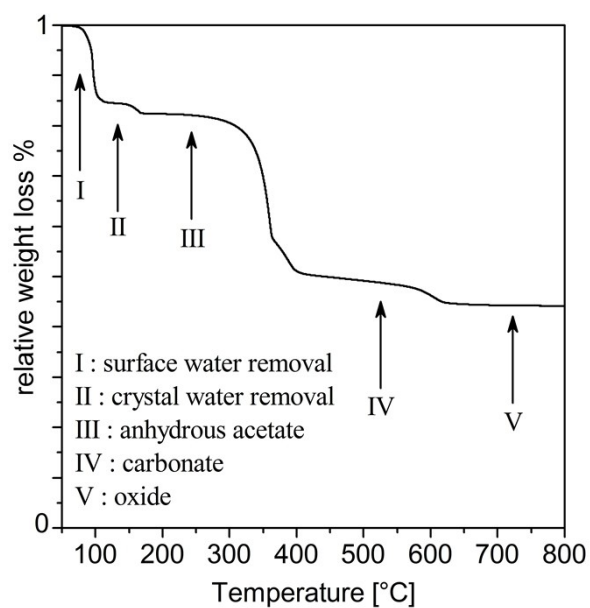

**Fig. S1:** Thermogravimetric analysis of the rare earth acetate hydrate precursor  $\text{RE}(\text{OAc})_3 \cdot \text{aq.}$  with  $\text{RE} = \text{Gd}_{0.8}, \text{Er}_{0.02}, \text{Yb}_{0.18}$ . The sample was heated by 5 K/min in a  $\text{N}_2$  flow of 20 ml/min.

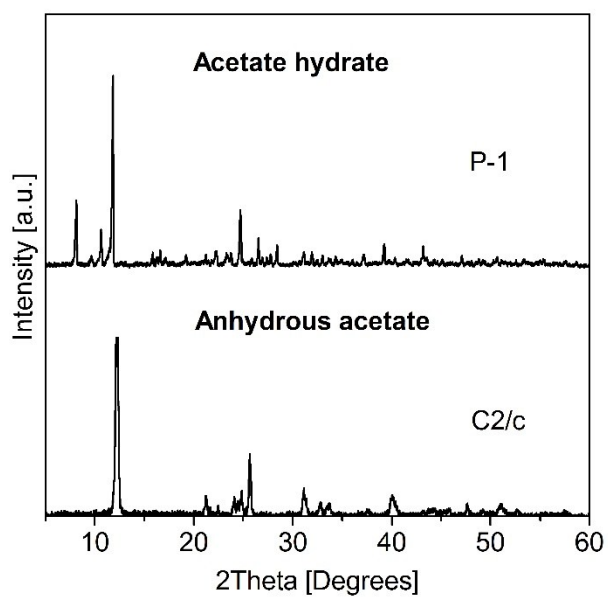

**Fig. S2:** Powder X-ray diffraction (XRD) patterns of the rare earth acetate hydrate  $\text{RE}(\text{OAc})_3 \cdot \text{aq.}$  (top) and the anhydrous rare earth acetate  $\text{RE}(\text{OAc})_3$  (bottom) with  $\text{RE} = \text{Gd}_{0.8}, \text{Er}_{0.02}, \text{Yb}_{0.18}$ . The space groups are specified in the figure and structures discussed in Ref. S1.

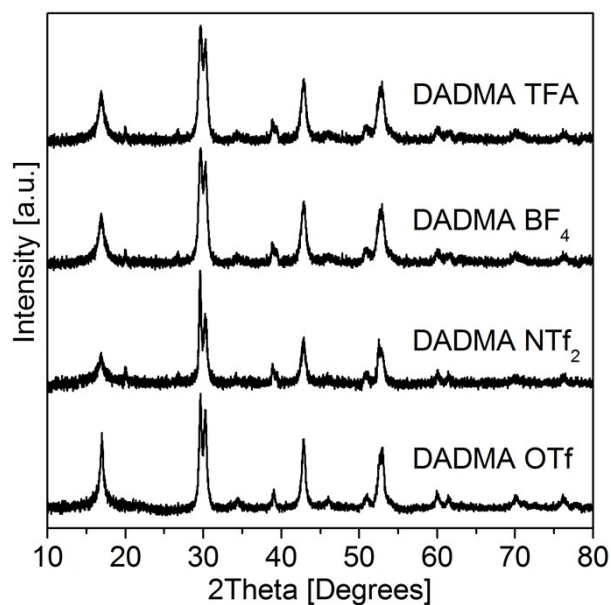

**Fig. S3:** Powder XRD patterns of nanocrystalline  $\beta$ -NaGdF<sub>4</sub>: 18% Yb<sup>3+</sup>, 2% Er<sup>3+</sup> samples synthesized in 0.5:1.5 vol. ethylene glycol (EG) / ionic liquid (IL) solutions with IL = diallyldimethylammonium (DADMA) trifluoroacetate (TFA), DADMA BF<sub>4</sub>, DADMA bis(trifluoromethanesulfonyl)amide (NTf<sub>2</sub>), and DADMA trifluoromethanesulfonate (OTf). Samples were synthesised from 60 mg RE(AcO)<sub>3</sub>, 20 mg NaCl, and 80 mg NH<sub>4</sub>F at 120°C for 30 min.

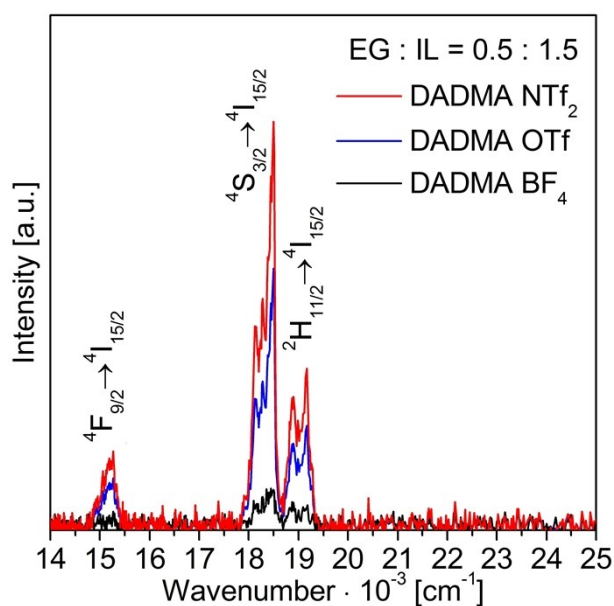

**Fig. S4:** UC luminescence of  $\beta$ -NaGdF<sub>4</sub>: 18% Yb<sup>3+</sup>, 2% Er<sup>3+</sup> nanoparticles from 0.5:1.5 vol. EG/IL solutions with IL = DADMA BF<sub>4</sub> (black trace), DADMA OTf (blue trace), and DADMA NTf<sub>2</sub> (red trace). Nanoparticles from the EG/DADMA TFA synthesis are not shown due to their very weak emission intensity. The UC luminescence was excited at 970 nm with 580 mW (unfocused) laser power.

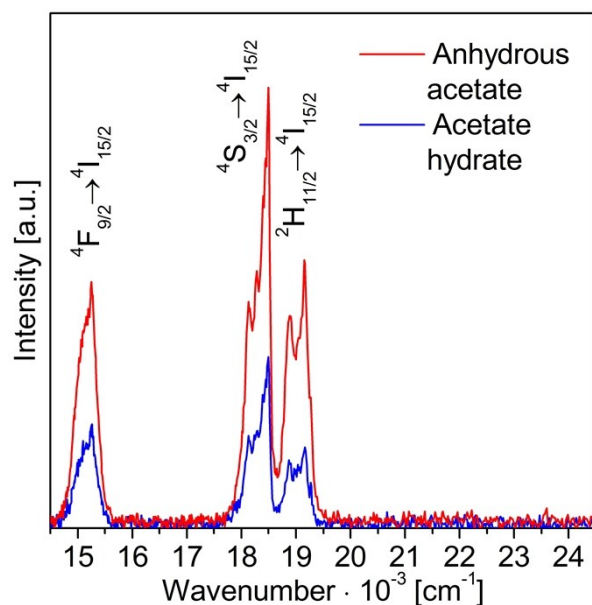

**Fig. S5:** Upconversion luminescence of  $\beta$ -NaGdF<sub>4</sub>: 18% Yb<sup>3+</sup>, 2% Er<sup>3+</sup> nanoparticles from a 0.5:1.5 vol. EG/IL synthesis with IL = DADMA NTf<sub>2</sub> and the rare earth acetate hydrate (blue trace) or the anhydrous rare earth acetate (red trace). Samples were synthesised from 30 mg RE(AcO)<sub>3</sub>, 10 mg NaCl, and 120 mg NH<sub>4</sub>F at 200°C for 30 min. The UC luminescence was excited at 970 nm with 580 mW (unfocused) laser power.

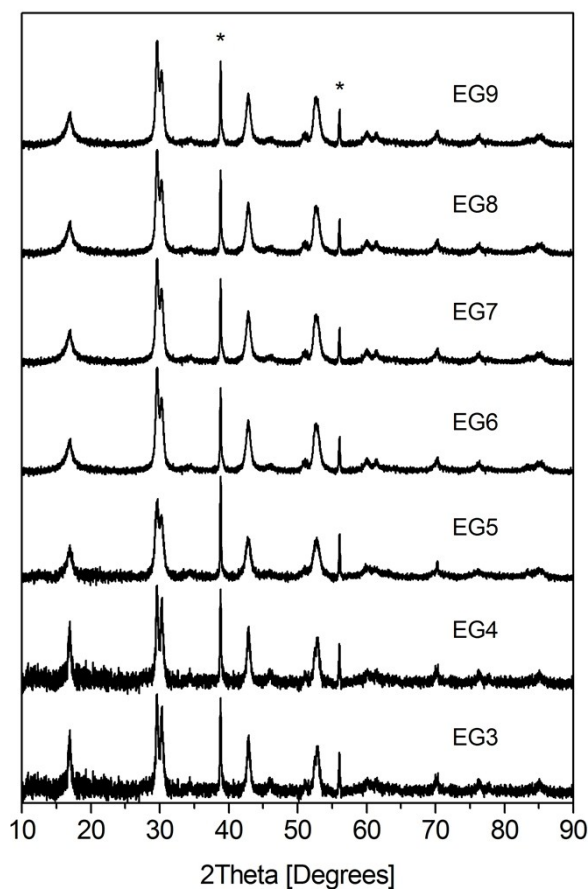

**Fig. S6:** Powder XRD patterns of  $\beta$ -NaGdF<sub>4</sub>: 18% Yb<sup>3+</sup>, 2% Er<sup>3+</sup> nanoparticles from EG/DADMA OTf syntheses. Sample names refer to Tab. 1. NaF peaks are marked by asterisks for the top trace.

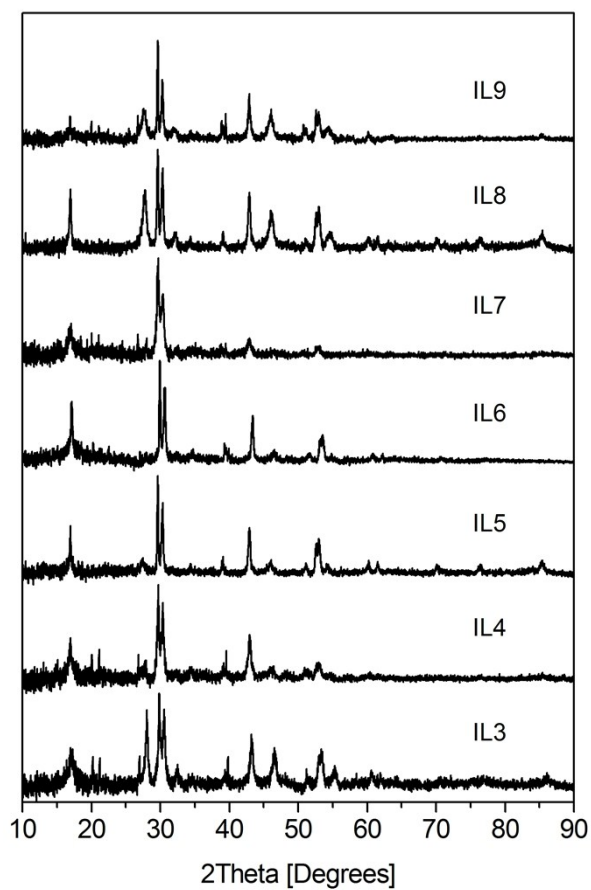

**Fig. S7:** Powder XRD patterns of  $\beta$ -NaGdF<sub>4</sub>: 18% Yb<sup>3+</sup>, 2% Er<sup>3+</sup> nanoparticles from IL syntheses. Sample names refer to Tab. 1.

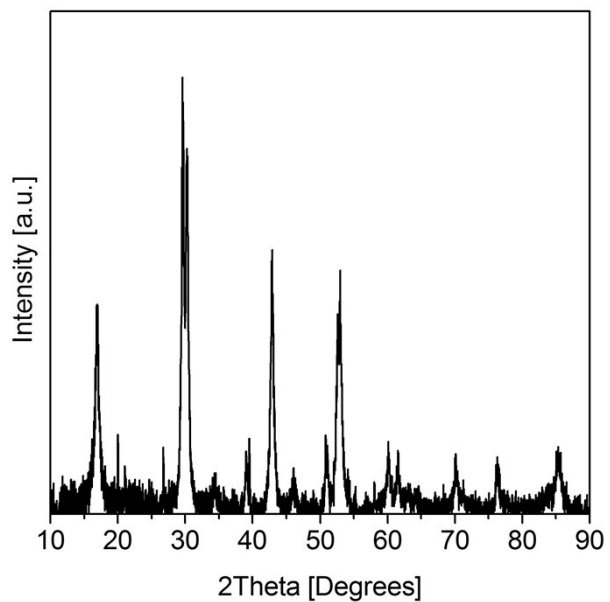

**Fig. S8:** Powder XRD pattern of  $\beta$ -NaGdF<sub>4</sub>: 18% Yb<sup>3+</sup>, 2% Er<sup>3+</sup> /  $\beta$ -NaGdF<sub>4</sub> core-shell nanoparticles from sample CS\_IL4.

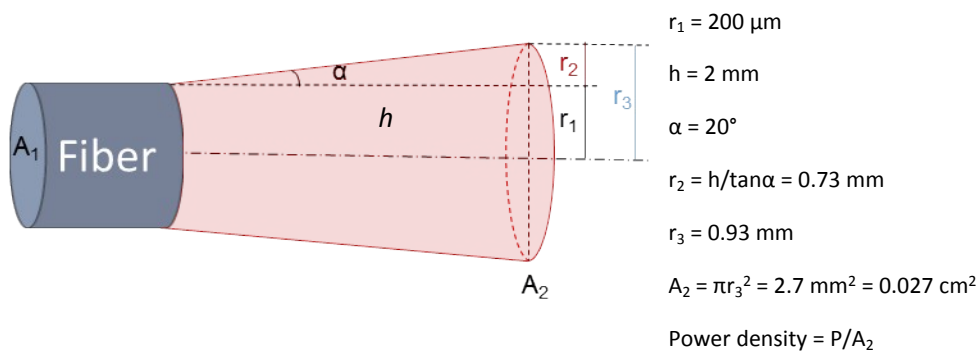

**Fig. S9:** Evaluation of the power density from the fiber geometry. The divergence angle  $\alpha = 20^\circ$  and the fiber radius  $r_1 = 200 \mu\text{m}$  determine the illuminated area  $A_2$ . The resulting power densities are reported in Tab. S1.

**Table S1:** Evaluated power density for the measured laser power used in this work.

| Power [mW] | Power density [W/cm <sup>2</sup> ] |
|------------|------------------------------------|
| 70         | 2.6                                |
| 330        | 12.2                               |
| 580        | 21.5                               |

#### Reference

S1 C. Heinrichs, PhD thesis, Universität zu Köln, Synthese und Charakterisierung wasserfreier Selterdmetall-Nitrate, -Acetate und -Oxyacetate, 2013.
